# Supplementary material for: Antigen spacing on protein nanoparticles influences antibody responses to vaccination
Source: PubMed Central journal article supplement — Cell Rep. Author manuscript; Available in PMC 2024 Jan 22. (PMC10801709; doi:10.1016/j.celrep.2023.113552), 2023-12-13
Supplement: NIHMS1954796-supplement-1.pdf [file NIHMS1954796-supplement-1.pdf]

**Supplemental information**

**Antigen spacing on protein nanoparticles  
influences antibody responses to vaccination**

**Daniel Ellis, Annie Dosey, Seyhan Boyoglu-Barnum, Young-Jun Park, Rebecca Gillespie, Hubza Syeda, Geoffrey B. Hutchinson, Yaroslav Tsybovsky, Michael Murphy, Deleah Pettie, Nick Matheson, Sidney Chan, George Ueda, Jorge A. Fallas, Lauren Carter, Barney S. Graham, David Veessler, Masaru Kanekiyo, and Neil P. King**

## SUPPLEMENTARY FIGURES

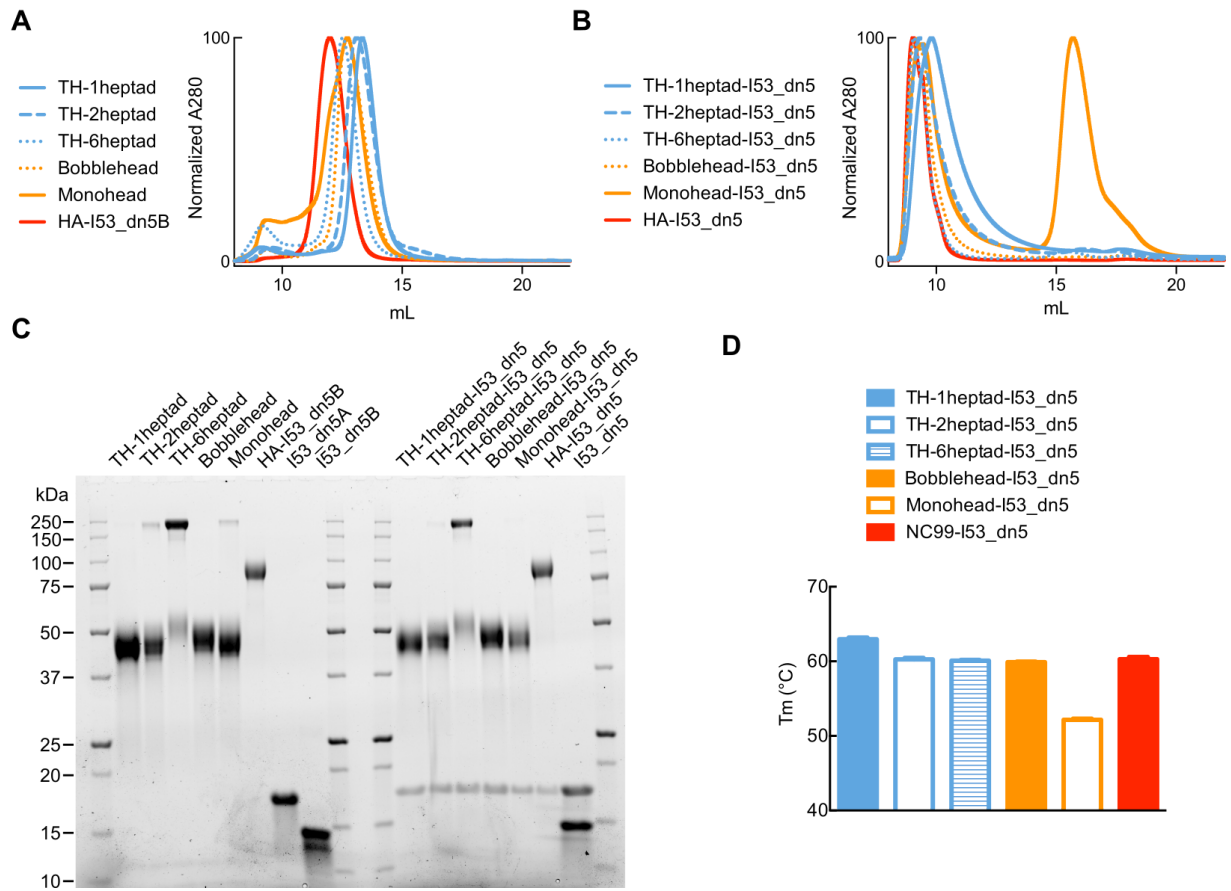

**Figure S1 Purification of trihead nanoparticle extension series, Related to Figure 2.**

(A) SEC chromatogram of trihead extension series components on a Superdex 200 Increase 10/300 GL column.

(B) SEC chromatogram of trihead extension series nanoparticles on a Superose 6 Increase 10/300 GL column.

(C) SDS-PAGE of trihead extension series components and nanoparticles.

(D) Melting temperatures of trihead extension series nanoparticles as measured by NanoDSF. The bars and errors bars represent the mean  $\pm$  SEM for technical replicates ( $n = 3$ ).

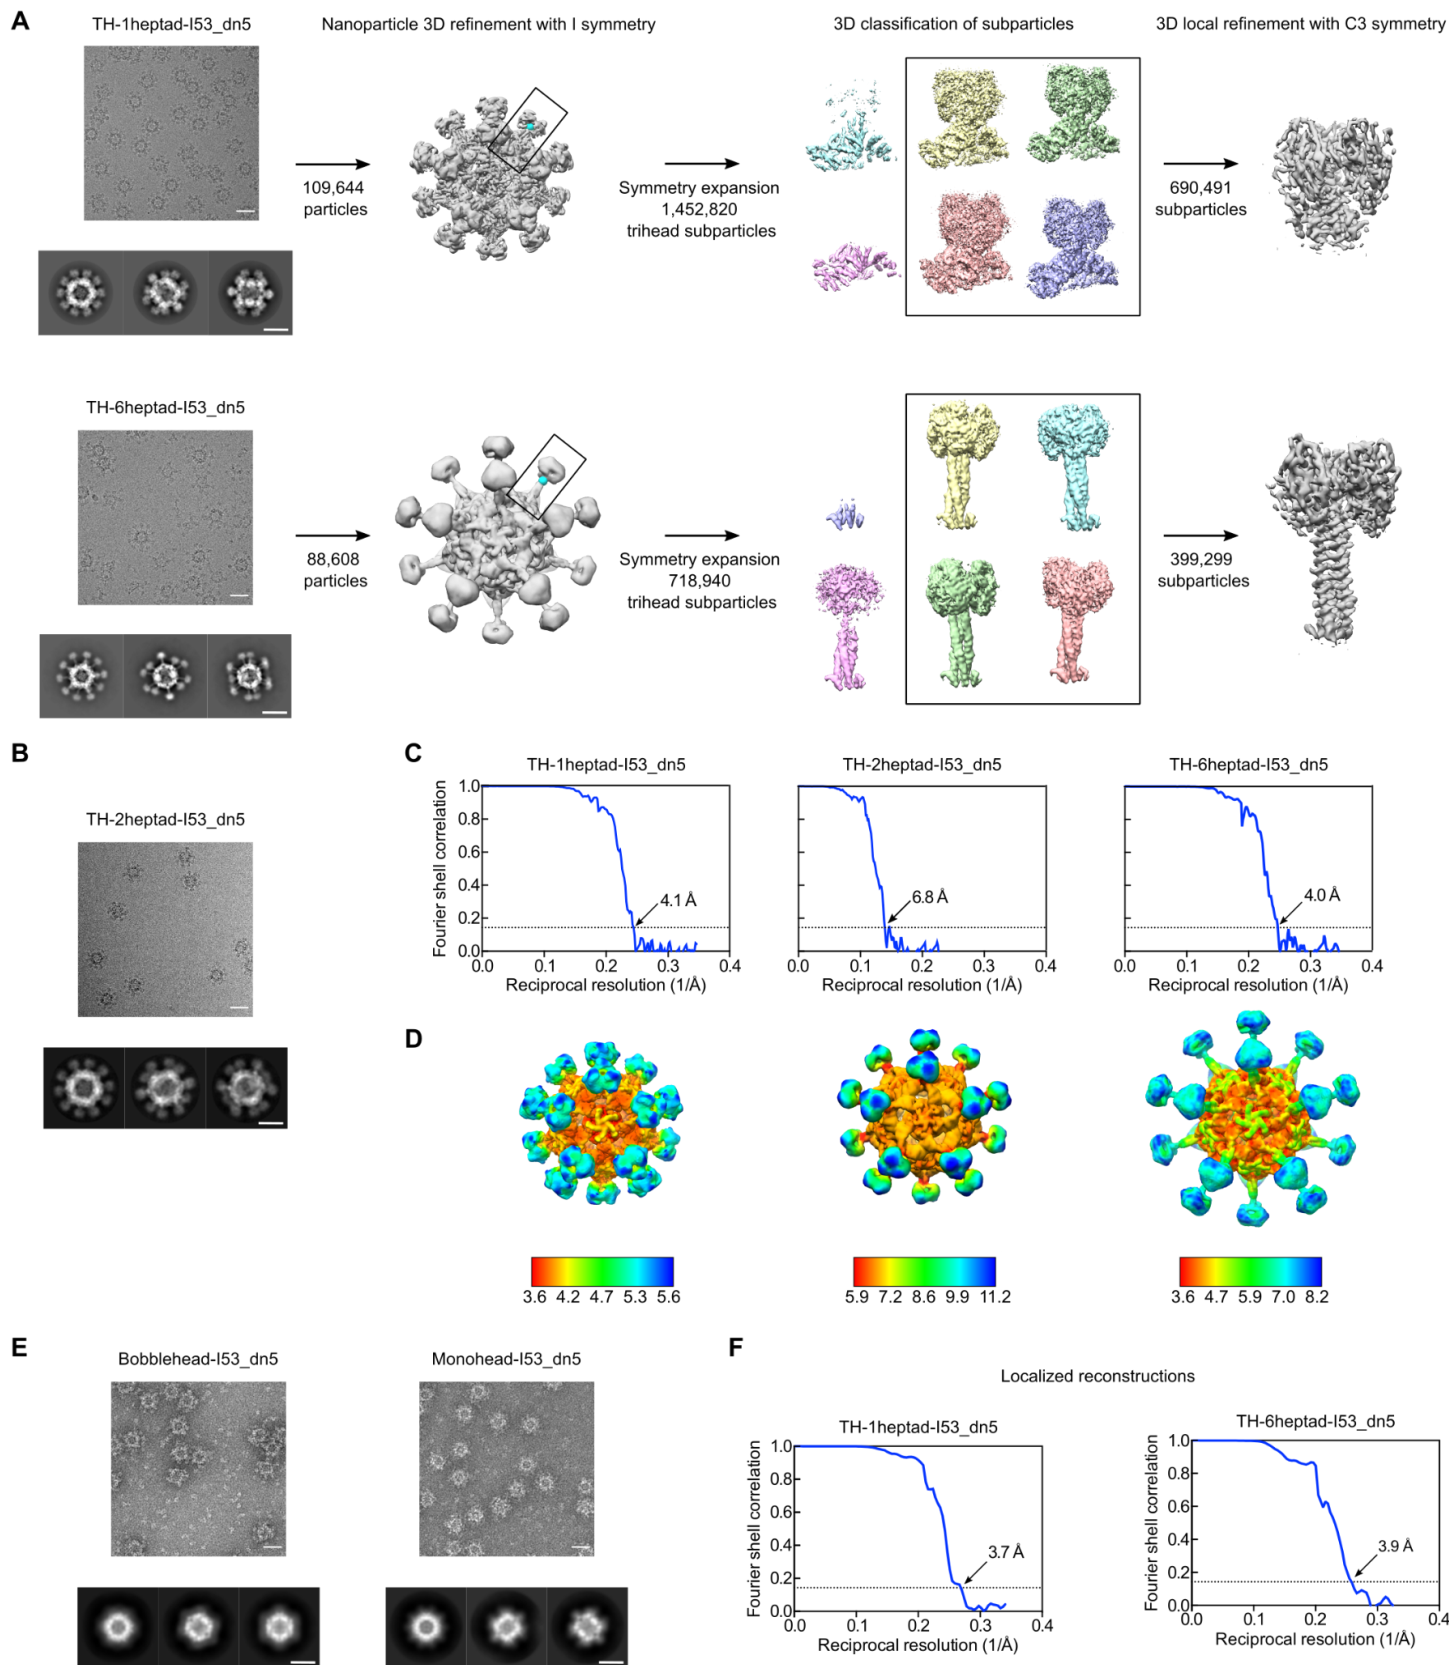

**Figure S2 Negative Stain and Cryo-EM Data Processing, Related to Figure 3.**

(A) Trihead reconstruction cryo-EM processing diagram for TH-1heptad-I53\_dn5 (top) and TH-6heptad-I53\_dn5 (bottom). Representative cryo-EM micrographs, scale bar = 50 nm, and 2D class averages, scale bar = 25 nm, and 2D class averages (left). Trihead nanoparticle reconstructions with marker (shown here in cyan) used to define the location of

trihead trimers within the icosahedral symmetry of the nanoparticles and to extract subparticles, which were then subject to 3D classification (middle). Boxed out 3D classes were combined and used in final local refinements (right).

(B) Representative cryo-EM micrograph and 2D class averages for TH-2heptad-I53\_dn5.

(C) Gold-standard Fourier shell correlation (FSC) curves for the trihead nanoparticle reconstructions in Figure 3A. The 0.143 cutoff is indicated by the dashed lines.

(D) Local resolution maps of the trihead nanoparticle reconstructions.

(E) Representative nsEM micrographs, scale bar = 50 nm, and 2D class averages, scale bar = 25 nm, of bobblehead and monohead nanoparticles.

(F) Gold-standard FSC curves for TH-1heptad-I53\_dn5 and TH-6heptad-I53\_dn5 localized reconstructions in Figure 3B.

---

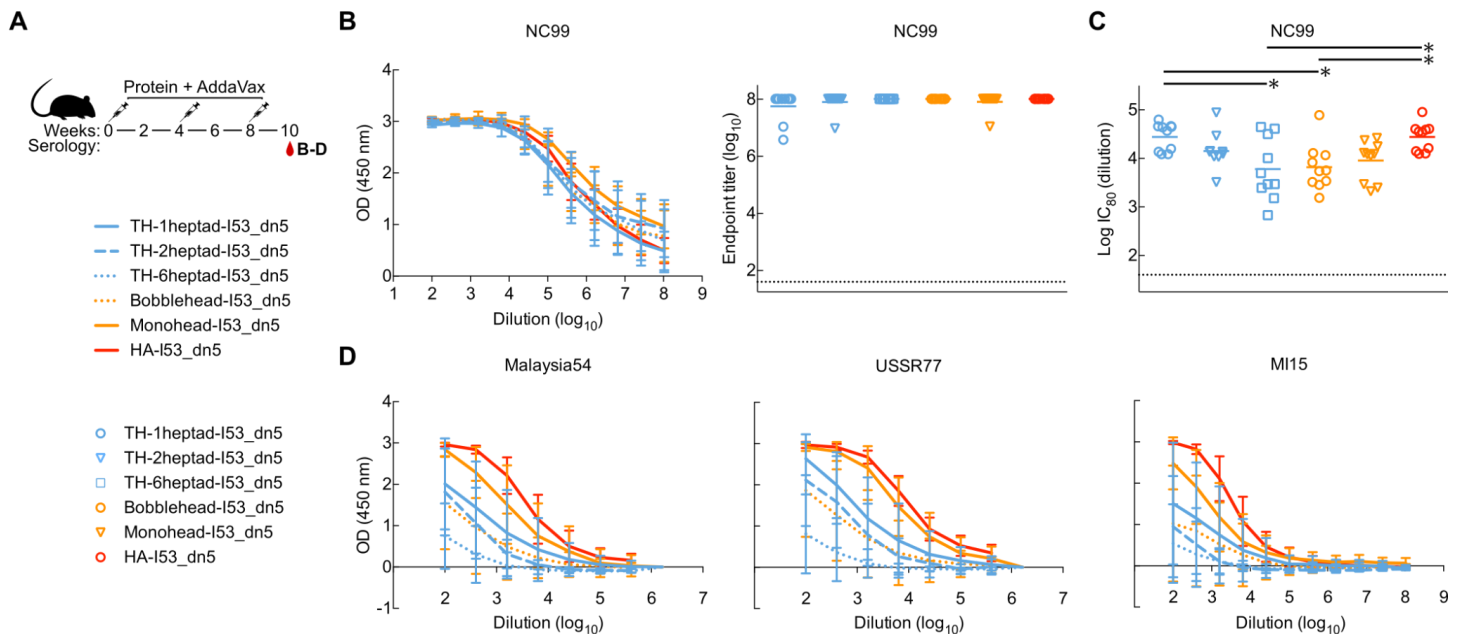

**Figure S3 Immune Responses in Mice Immunized with Trihead Nanoparticle Extension Series, Related to Figure 4.**

(A) Mouse immunization schedule and groups for adjuvanted trihead nanoparticle extension series.

(B) Vaccine-matched NC99 ELISA curves and binding titers in adjuvanted immune sera.

(C) Vaccine-matched NC99 ELISA microneutralization titers in adjuvanted immune sera.

(D) Adjuvanted immune sera ELISA curves against vaccine-mismatched H1 foldon trimers.

Each symbol represents an individual animal, and the geometric mean of each group is indicated by the bar ( $n = 9-10$  mice/group). Each line and error bar represents the geometric mean and geometric mean SD, respectively, of the absorbance at 450 nm ( $n = 9-10$  mice/group). Statistical significance was determined using one-way ANOVA with Tukey's multiple comparisons test; \* $p < 0.05$ ; \*\* $p < 0.01$ ; \*\*\* $p < 0.001$ ; \*\*\*\* $p < 0.0001$ .

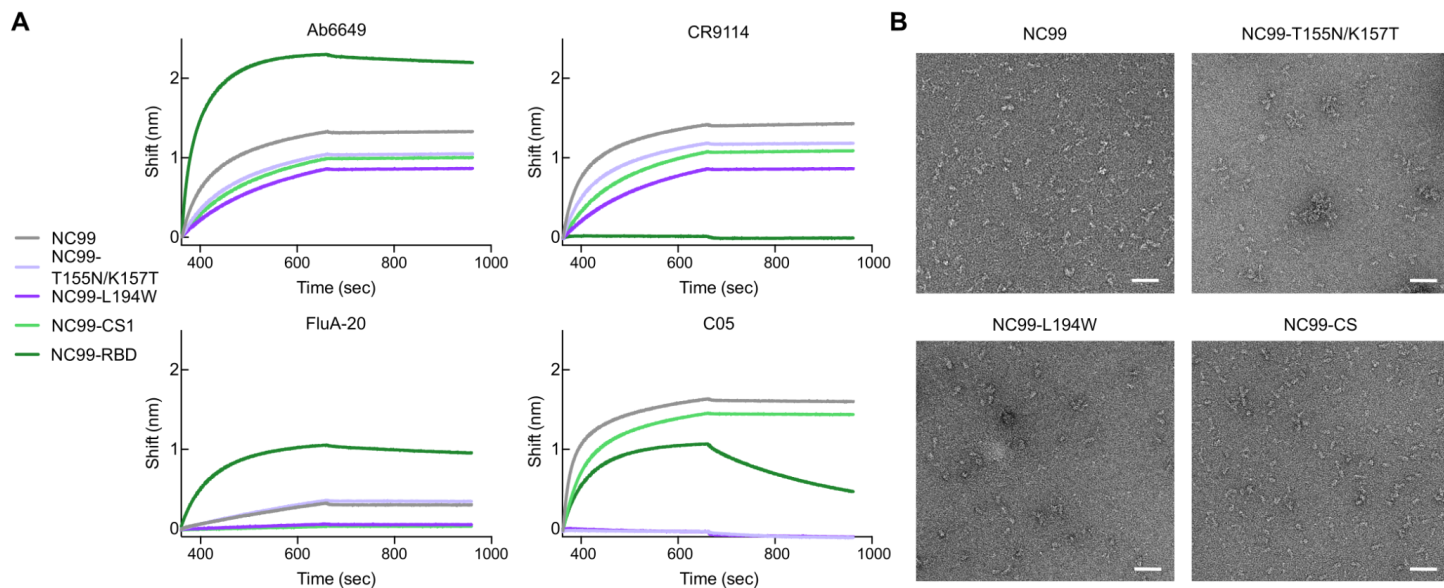

**Figure S4 Biophysical characterization of NC99 probes, Related to Figure 5.**

(A) BLI of NC99 probes against various HA mAbs.

(B) nsEM micrographs of NC99 probes. Scale bars = 50 nm.

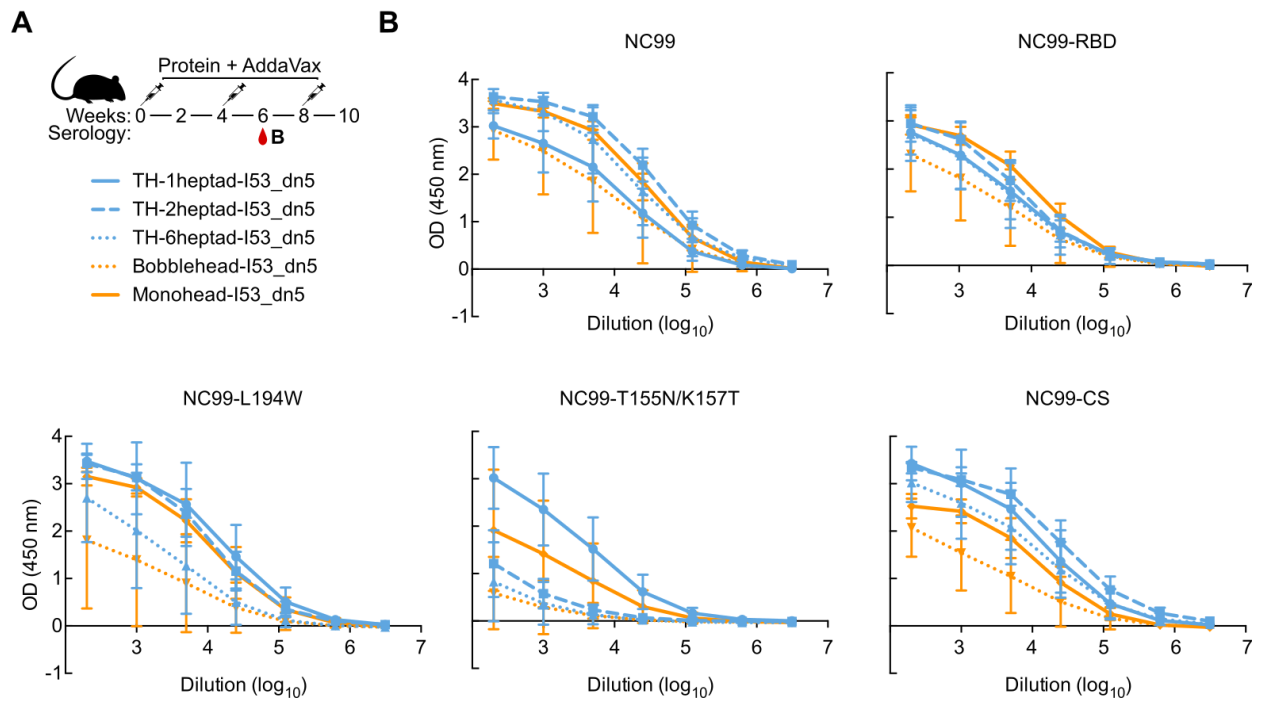

**Figure S5 Epitope Mapping of Vaccine-elicited Antibodies, Related to Figure 5.**

(A) Mouse immunization schedule and groups for adjuvanted trihead nanoparticle extension series.

(B) Week 6 adjuvanted immune sera ELISA curves against various NC99 probes. Each line and error bar represents the geometric mean and geometric mean SD, respectively, of the absorbance at 450 nm ( $n = 9-10$  mice/group).

**Table S1. Amino acid sequences of proteins used in this study, Related to STAR Methods.**

>Monohead

MDSKGSSQKGSRLLLLLVSNLLL PQGVLAIAPLQLGNCSVAGWILGNPECELLISKESWSYIVETPNPENGTCFPGYFADY  
EELRQLSSVSSFERFEIFPKESSWPNHTVTGVSASC SHNGKSSFYRNLLWLTGKNGLYPNLSKSYVNNKEKEVLVLWGV  
HHPNIGNQRALYHTENAYVSVSSHYSRRFTPEIAKRPKVRDQEGRINYYWTLLEPGDTIIFEANGNLIAPWYAFALSRGF  
GSGSGKRIENILSKIYHIENEIAELAYLLGELAYKLGEYRIAIRAYRIALKSDPNNAEAWYNLGNAYYKQGRYREAIEYYQKALE  
LDPNNAEAWYNLGNAYYERGEYEEAIEYYRKALRLDPNNADAMQNLLNAKMREEGGWELQH HHHHHH

>Monohead-SS1

MDSKGSSQKGSRLLLLLVSNLLL PQGVLAIAPLQLGNCSVAGWILGNPECELLISKESWSYIVETPNPENGTCFPGYFADY  
EELRCQLSSVSSFERFEIFPKESSWPNHTVTGVSASC SHNGKSSFYRNLLWLTGKNGLYPNLSKSYVNNKEKEVLVLWGV  
HHPNIGNQRALYHTENAYVSVSSHYSRRFTPEIAKRPKVRDQEGRINYYWTLLEPGDTIIFEANGNLIAPWYAFALSRGF  
GSGSGSCIENINSKIYHIENEIAELAYLLGELAYKLGEYRIAIRAYRIALKSDPNNAEAWYNLGNAYYKQGRYREAIEYYQKAL  
ELDPNNAEAWYNLGNAYYERGEYEEAIEYYRKALRLDPNNADAMQNLLNAKMREEGGWELQH HHHHHH

>TH-1heptad

MDSKGSSQKGSRLLLLLVSNLLL PQGVLAIAPLQLGNCSVAGWILGNPECELLISKESWSYIVETPNPENGTCFPGYFADY  
EELRCQLSSVSSFERFEIFPKESSWPNHTVTGVSASC SHNGKSSFYRNLLWLTGKNGLYPNLSKSYVNNKEKEVLVLWGV  
HHPNIGNQRALYHTENAYVLVSSH YDRVFTPIIAKRPKVRDQEGRINYYWTLLEPGDTIIFEANGNLIAPWYAFALSRGFG  
SGSGSCIEHIENEIAELAYLLGELAYKLGEYRIAIRAYRIALKSDPNNAEAWYNLGNAYYKQGRYREAIEYYQKALELDPNNAE  
AWYNLGNAYYERGEYEEAIEYYRKALRLDPNNADAMQNLLNAKMREEGGWELQH HHHHHH

>TH-2heptad

MDSKGSSQKGSRLLLLLVSNLLL PQGVLAIAPLQLGNCSVAGWILGNPECELLISKESWSYIVETPNPENGTCFPGYFADY  
EELRCQLSSVSSFERFEIFPKESSWPNHTVTGVSASC SHNGKSSFYRNLLWLTGKNGLYPNLSKSYVNNKEKEVLVLWGV  
HHPNIGNQRALYHTENAYVLVSSH YDRVFTPIIAKRPKVRDQEGRINYYWTLLEPGDTIIFEANGNLIAPWYAFALSRGFG  
SGSGSCIENINSKIYHIENEIAELAYLLGELAYKLGEYRIAIRAYRIALKSDPNNAEAWYNLGNAYYKQGRYREAIEYYQKALEL  
DPNNAEAWYNLGNAYYERGEYEEAIEYYRKALRLDPNNADAMQNLLNAKMREEGGWELQH HHHHHH

>TH-6heptad

MDSKGSSQKGSRLLLLLVSNLLL PQGVLAIAPLQLGNCSVAGWILGNPECELLISKESWSYIVETPNPENGTCFPGYFADY  
EELRCQLSSVSSFERFEIFPKESSWPNHTVTGVSASC SHNGKSSFYRNLLWLTGKNGLYPNLSKSYVNNKEKEVLVLWGV  
HHPNIGNQRALYHTENAYVLVSSH YDRVFTPIIAKRPKVRDQEGRINYYWTLLEPGDTIIFEANGNLIAPWYAFALSRGFG  
SGSGSCIENINSKIYHIEDKIEEINR KIEHILSKIYHIERKIEEILNEIAELAYLLGELAYKLGEYRIAIRAYRIALKSDPNNAEAWYN  
LGNAYYKQGRYREAIEYYQKALELDPNNAEAWYNLGNAYYERGEYEEAIEYYRKALRLDPNNADAMQNLLNAKMREEGG  
WELQH HHHHHH

>Bobblehead-I53\_dn5

MDSKGSSQKGSRLLLLLVSNLLL PQGVLAIAPLQLGNCSVAGWILGNPECELLISKESWSYIVETPNPENGTCFPGYFADY  
EELRCQLSSVSSFERFEIFPKESSWPNHTVTGVSASC SHNGKSSFYRNLLWLTGKNGLYPNLSKSYVNNKEKEVLVLWGV  
HHPNIGNQRALYHTENAYVLVSSH YDRVFTPIIAKRPKVRDQEGRINYYWTLLEPGDTIIFEANGNLIAPWYAFALSRGFG  
SGSGSCIENINSKIYHIENEIARIK KLIGESGGSGGESAE LAYLLGELAYKLGEYRIAIRAYRIALKSDPNNAEAWYNLGNAYYK  
QGRYREAIEYYQKALELDPNNAEAWYNLGNAYYERGEYEEAIEYYRKALRLDPNNADAMQNLLNAKMREEGGWELQH H  
HH

>HA-I53\_dn5

MKAKLLVLLCTFTATYADTICIGYHANNSTDTVDTVLEKNVTVTHSVNLL EDSHNGKLC LLKGIAPLQLGNCSVAGWILGNPE  
CELLISKESWSYIVETPNPENGTCFPGYFADYEELRQLSSVSSFERFEIFPKESSWPNHTVTGVSASC SHNGKSSFYRN  
LWLTGKNGLYPNLSKSYVNNKEKEVLVLWGVHHPNIGNQRALYHTENAYVSVSSHYSRRFTPEIAKRPKVRDQEGRIN  
YWTLLEPGDTIIFEANGNLIAPWYAFALSRGFGSGIITSNAPMDECDACQTPQGAINSSLPFQNVHPVTIGECPKYVRS  
AKLRMVTGLRNIPSIQSRGLFGAIA GFIEGGWTGMVDGWYGYHHQNEQGSYAADQKSTQNAINGITNKVNSVIEKMNTQ  
FTA VGKEFNKLERRMENLNKKVDDGFLDIWTYNAELLV LLENERTLDFHDSNVKNLYEKVKSQ LKNNAKEIGNGCFE  
FYHKCN



ECMESVKNGTYDYPKYSEESKLNREKIDGVSAAEEAELAYLLGELAYKLGEYRIAIRAYRIALKRDPNNAEAWYNLGNAYYKQ  
GRYREAIEYYQKALELDPNNAEAWYNLGNAYYERGEYEEAIEYYRKALRLDPNNADAMQNLLNAKMREEGGWELQH~~HHH~~  
~~HH~~

>I53\_dn5A.1

MGKYDGSKLRIGILHARGNAEILALVLGALKRLQEFQVGRKRENIIEVTPGSFELPYGSKLFVEKQKRLGKPLDAIPIGVLIRGS  
TPHFDYIADSTTHQLMKLNFELGIPVIFGVITADTDEQAEARAGLIEGKMHNHGEDWGAAAVEMATKFNLE~~HHHHHHH~~  
~~H~~

>NC99

MKAKLLVLLCTFTATYADTICIGYHANNSTDTVDTVLEKNVTVTHSVNLLLED SHNGKLCLLKGIAPLQLGNCSVAGWILGNPE  
CELLISKESWSYIVETPNPENGTCFPGYFADYEELREQLSSVSSFERFEIFPKESSWPNHVTGVSASC SHNGKSSFYRNL  
LWLTGKNGLYPNLSKSYVNNKEKEVLVLWGVHHPNIGNQRALYHTENAYVSVSSHYSRRFTPEIAKRPKVRDQEGRINY  
YWTLLPGDTIIFEANGNLIAPWYAFALSRGFGSGIITSNAPMDECDACQTPQGAINSSLPFQNVHPVTIGEC PKYVRSACL  
RMVTGLRNIPQRETRGLFGAIAGFIEGGWTGMVDGWYGYHHQNEQSGGYAADQKSTQNAINGITNKVNSVIEKMNTQFTA  
VGKEFNKLERRMENLNKKVDDGFLDIWTYNAELLVLL ENERTLDFHDSNVKNLYEKVKSQ LKNNAKEIGNGC FEFYHKCN  
ECMESVKNGTYDYPKYSEESKLNREKIDGSGYIPEAPRDGQAYVRKDG EWVLLSTFL~~GSGLNDIFEAQKIEWHEGHHHHH~~  
~~H~~

>NC99-T155N/K157T

MKAKLLVLLCTFTATYADTICIGYHANNSTDTVDTVLEKNVTVTHSVNLLLED SHNGKLCLLKGIAPLQLGNCSVAGWILGNPE  
CELLISKESWSYIVETPNPENGTCFPGYFADYEELREQLSSVSSFERFEIFPKESSWPNHVTGVSASC SHNGKSSFYRNL  
LWLNGTNGLYPNLSKSYVNNKEKEVLVLWGVHHPNIGNQRALYHTENAYVSVSSHYSRRFTPEIAKRPKVRDQEGRINY  
YWTLLPGDTIIFEANGNLIAPWYAFALSRGFGSGIITSNAPMDECDACQTPQGAINSSLPFQNVHPVTIGEC PKYVRSACL  
RMVTGLRNIPQRETRGLFGAIAGFIEGGWTGMVDGWYGYHHQNEQSGGYAADQKSTQNAINGITNKVNSVIEKMNTQFTA  
VGKEFNKLERRMENLNKKVDDGFLDIWTYNAELLVLL ENERTLDFHDSNVKNLYEKVKSQ LKNNAKEIGNGC FEFYHKCN  
ECMESVKNGTYDYPKYSEESKLNREKIDGSGYIPEAPRDGQAYVRKDG EWVLLSTFL~~GSGLNDIFEAQKIEWHEGHHHHH~~  
~~H~~

>NC99-L194W

MKAKLLVLLCTFTATYADTICIGYHANNSTDTVDTVLEKNVTVTHSVNLLLED SHNGKLCLLKGIAPLQLGNCSVAGWILGNPE  
CELLISKESWSYIVETPNPENGTCFPGYFADYEELREQLSSVSSFERFEIFPKESSWPNHVTGVSASC SHNGKSSFYRNL  
LWLTGKNGLYPNLSKSYVNNKEKEVLVLWGVHHPNIGNQRALYHTENAYVSVSSHYSRRFTPEIAKRPKVRDQEGRIN  
YYWTLLPGDTIIFEANGNLIAPWYAFALSRGFGSGIITSNAPMDECDACQTPQGAINSSLPFQNVHPVTIGEC PKYVRSACL  
KLRMVTGLRNIPQRETRGLFGAIAGFIEGGWTGMVDGWYGYHHQNEQSGGYAADQKSTQNAINGITNKVNSVIEKMNTQF  
TAVGKEFNKLERRMENLNKKVDDGFLDIWTYNAELLVLL ENERTLDFHDSNVKNLYEKVKSQ LKNNAKEIGNGC FEFYHKC  
NNECMESVKNGTYDYPKYSEESKLNREKIDGSGYIPEAPRDGQAYVRKDG EWVLLSTFL~~GSGLNDIFEAQKIEWHEGHHH~~  
~~HHH~~

>NC99-CS

MKAKLLVLLCTFTATYADTICIGYHANNSTDTVDTVLEKNVTVTHSVNLLLED SHNGKLCLLKGIAPLQLGNCSVAGWILGNPE  
CELLISKESWSYIVETPNPENGTCFPGYFADYEELREQLSSVSSFERFEIFPKESSWPNHVTGVSASC SHNGKSSFYRNL  
LWLTGKNGLYPNLSKSYVNNKEKEVLVLWGVHHPNIGNQRALYHTENAYVLVSSHYDRVFTPIIAKRPKVRDQEGRINYY  
WTLLPGDTIIFEANGNLIAPWYAFALSRGFGSGIITSNAPMDECDACQTPQGAINSSLPFQNVHPVTIGEC PKYVRSACL  
MVTGLRNIPQRETRGLFGAIAGFIEGGWTGMVDGWYGYHHQNEQSGGYAADQKSTQNAINGITNKVNSVIEKMNTQFTAV  
GKEFNKLERRMENLNKKVDDGFLDIWTYNAELLVLL ENERTLDFHDSNVKNLYEKVKSQ LKNNAKEIGNGC FEFYHKCN  
CMESVKNGTYDYPKYSEESKLNREKIDGSGYIPEAPRDGQAYVRKDG EWVLLSTFL~~GSGLNDIFEAQKIEWHEGHHHHH~~  
~~HHH~~

>NC99-RBD

MDSKGSSQKGSRLLLLLVSNLLL PQGVLAIAPLQLGNCSVAGWILGNPECELLISKESWSYIVETPNPENGTCFPGYFADY  
EELREQLSSVSSFERFEIFPKESSWPNHVTGVSASC SHNGKSSFYRNLWLTGKNGLYPNLSKSYVNNKEKEVLVLWGV  
HHPNIGNQRALYHTENAYVSVSSHYSRRFTPEIAKRPKVRDQEGRINYYWTLLPGDTIIFEANGNLIAPWYAFALSRGA  
~~GSGLNDIFEAQKIEWHELEVLFFQGP~~~~HHHHHHH~~

>NC99-RBD-TI

MDSKGSSQKGSRLLLLLVSNLLLPQGVLAIAPLQLGNCSVAGWILGNPECELLISKESWSYIVETPNPENGTCFPGYFADY  
EELREQLSSVSSFERFEIFPKESSWPNHTVTGVSASC SHNGKSSFYRNLLWLTGKNGLYPNLSKSYVNNKEKEVLVLWGV  
HHPPNIGNQRALYHTENAYVLVSSHYDRVFTPIIAKRPKVRDQEGRINYYWTLLLEPGDTIIFEANGNLIAPWYAFALSRGAG  
SGLNDIFEAQKIEWHELEVLFGPGHHHHH

**Table S2. Cryo-EM data collection and refinement statistics, Related to Figure 3.**

|                                                     | TH-1heptad-<br>I53_dn5<br>EMD: 42481 | TH-1heptad-<br>I53_dn5<br>(local refinement)<br>PDB: 8UR5<br>EMD: 42482 | TH-2heptad-<br>I53_dn5<br>EMD: 42483 | TH-6heptad-<br>I53_dn5<br>EMD: 42485 | TH-6heptad-<br>I53_dn5<br>(local refinement)<br>PDB: 8UR7<br>EMD: 42486 |
|-----------------------------------------------------|--------------------------------------|-------------------------------------------------------------------------|--------------------------------------|--------------------------------------|-------------------------------------------------------------------------|
| <b>Data collection and processing</b>               |                                      |                                                                         |                                      |                                      |                                                                         |
| Magnification (×)                                   | 36,000                               | 36,000                                                                  | 130,000                              | 36,000                               | 36,000                                                                  |
| Voltage (kV)                                        | 200                                  | 200                                                                     | 300                                  | 200                                  | 200                                                                     |
| Electron exposure (e <sup>-</sup> /Å <sup>2</sup> ) | 60                                   | 60                                                                      | 70                                   | 60                                   | 60                                                                      |
| Defocus range (μm)                                  | -0.5 - -2.5                          | -0.5 - -2.5                                                             | -0.5 - -2.5                          | -0.5 - -2.5                          | -0.5 - -3.5                                                             |
| Pixel size (Å)                                      | 1.16                                 | 1.16                                                                    | 0.525                                | 1.16                                 | 1.16                                                                    |
| Symmetry imposed                                    | I                                    | C3                                                                      | I                                    | I                                    | C3                                                                      |
| Final particle images (no.)                         | 72,641                               | 690,491                                                                 | 1,986                                | 35,947                               | 399,299                                                                 |
| Map resolution (Å)                                  | 4.1                                  | 3.7                                                                     | 6.8                                  | 4.0                                  | 3.9                                                                     |
| FSC threshold                                       | 0.143                                | 0.143                                                                   | 0.143                                | 0.143                                | 0.143                                                                   |
| Map sharpening B factor (Å <sup>2</sup> )           | -215                                 | -244                                                                    | -797                                 | -186                                 | -213                                                                    |
| <b>Validation</b>                                   |                                      |                                                                         |                                      |                                      |                                                                         |
| MolProbity score                                    |                                      | 1.86                                                                    |                                      |                                      | 1.74                                                                    |
| Clashscore                                          |                                      | 6.45                                                                    |                                      |                                      | 7.52                                                                    |
| Poor rotamers (%)                                   |                                      | 1.71                                                                    |                                      |                                      | 0.66                                                                    |
| Ramachandran plot                                   |                                      |                                                                         |                                      |                                      |                                                                         |
| Favored (%)                                         |                                      | 95.22                                                                   |                                      |                                      | 95.27                                                                   |
| Allowed (%)                                         |                                      | 4.35                                                                    |                                      |                                      | 4.73                                                                    |
| Disallowed (%)                                      |                                      | 0.43                                                                    |                                      |                                      | 0                                                                       |
